# Supplementary material for: MiR-106b-5p: A Master Regulator of Potential Biomarkers for Breast Cancer Aggressiveness and Prognosis
Source: MDPI journal article supplement (doi:10.3390/ijms222011135), 2021-10-15
Supplement: s1 [file s1]

**Supplementary Table S1.** List of target-genes used to perform Venn's Diagram.

| miRNAs                                   | Number | Common genes |           |          |         |          |         |         |
|------------------------------------------|--------|--------------|-----------|----------|---------|----------|---------|---------|
| Hsa-miR-106b-5p, miR-143-3p & miR-21-5p  | 5      | PRKAB2       | TNFRSF10B | RC3H2    | CBX5    | STRN     |         |         |
| Hsa-miR-106b-5p, miR-205-5p & miR-21-5p  | 3      | PTP4A2       | GRSF1     | ATL3     |         |          |         |         |
| Hsa-miR-106b-5p, miR-143-3p & miR-205-5p | 1      | AHNAK        |           |          |         |          |         |         |
| Hsa-miR-106b-5p & miR-21-5p              | 51     | LTV1         | GNG12     | FAM160B1 | KANSL1L | PHF6     | ABAT    | BRWD1   |
|                                          |        | CCNI         | ARMC8     | ZRANB1   | WEE1    | SESN1    | MSI2    | IGF2BP1 |
|                                          |        | CHD9         | EPHA4     | SCD      | TOPORS  | MAP3K2   | FAM46C  | RYBP    |
|                                          |        | ARL1         | CNOT6     | STAT3    | GAPVD1  | ARRDC3   | NIPAL1  |         |
|                                          |        | YOD1         | UBE2W     | HBP1     | KPNA4   | PLAG1    | RSF1    |         |
|                                          |        | PAFAH1B1     | PRRX1     | HIAT1    | CBFB    | MARCH6   | GAB1    |         |
|                                          |        | FRS2         | YY1       | PANK3    | ZYG11B  | DEGS1    | APPL1   |         |
|                                          |        | MEF2A        | PPP1R3B   | LAMC1    | TBCEL   | SNX30    | RPS6KA3 |         |
| Hsa-miR-143-3p & miR-21-5p               | 14     | ATXN10       | GPRC5A    | RMND5A   | SFXN1   | AP3M1    | FNDC3B  | RNF11   |
|                                          |        | PKD2         | CCDC93    | KMT2D    | PDZD8   | QSER1    | JPH1    | COL12A1 |
| Hsa-miR-205-5p & miR-21-5p               | 3      | FAM63B       | CCNG1     | TOR1AIP2 |         |          |         |         |
| Hsa-miR-106b-5p & miR-143-3p             | 21     | SSH2         | VGLL3     | NPAT     | ZNF217  | ELK4     | PPP2R2A | PTP4A1  |
|                                          |        | ABL2         | RAD23B    | PRDM4    | PTPN4   | VKORC1L1 | CRTC3   | SOBP    |
|                                          |        | PALLD        | OTUD4     | IER3     | KAT6A   | WIPF2    | PPP4R2  | SMIM13  |
| Hsa-miR-106b-5p & miR-205-5p             | 6      | ZNF827       | SEMA7A    | SUPT16H  | B3GNT1  | MED13    | DNAJC13 |         |

|                             |     |          |         |              |          |           |          |          |
|-----------------------------|-----|----------|---------|--------------|----------|-----------|----------|----------|
| Hsa-miR-143-3p & miR-205-5p | 1   | SENP2    |         |              |          |           |          |          |
| Hsa-miR-21-5p               | 182 | B3GNT5   | CCAR1   | SOX9         | SNX29    | HNRNPA2B1 | ZFYVE16  | DUSP16   |
|                             |     | NUFIP2   | PTK2    | SEC63        | FKTN     | RASGRP1   | CMBL     | BCL11A   |
|                             |     | ANXA1    | TRIM2   | RAB27B       | PTAR1    | EIF5      | OSBPL11  | TESK2    |
|                             |     | TC2N     | COPS4   | FBXO46       | PRICKLE2 | TNPO1     | CXCL10   | DNM1L    |
|                             |     | CENPQ    | EIF1AX  | SUB1         | MTMR9    | CAPN2     | DDX1     | ARHGAP24 |
|                             |     | TRIM33   | SKP2    | PCBP1        | IRF2BPL  | PAPD7     | IPO11    | ADAM22   |
|                             |     | HMGB3    | SOS2    | SMAD7        | FOXK1    | CEP97     | AZIN1    | LRRC57   |
|                             |     | ZBTB34   | THRB    | DDI2         | RGS1     | UBA6      | MDN1     | CLIC2    |
|                             |     | SMARCD1  | MAPRE1  | OSBPL3       | RERE     | ZNF10     | EHD1     | CLNS1A   |
|                             |     | YEATS4   | PHF16   | GID4         | GLCCI1   | ATP5G3    | RAB11A   | HGSNAT   |
|                             |     | C10orf12 | NRIP1   | OLR1         | RTN4     | OSR1      | NCOA2    | AGO4     |
|                             |     | LYRM2    | BNIP2   | SLC44A1      | FASLG    | RHOB      | ZNF462   | GATAD2B  |
|                             |     | ATAD2B   | PRRG4   | KIAA1551     | FAM3C    | GNAQ      | NPTN     | LYRM7    |
|                             |     | TBK1     | DCUN1D3 | FOXN2        | PRKAA2   | IGF1R     | AGPAT5   | WDR3     |
|                             |     | STAG2    | SMC1A   | PKNOX1       | CCSER2   | ALDH1A1   | CSTB     | KIAA1432 |
|                             |     | HRK      | PJA2    | ZSWIM6       | ATP11B   | KIAA1549  | MXD1     | PGM3     |
|                             |     | ARHGEF12 | ENAH    | TNS1         | LMNB1    | MRPL49    | CCT5     | HNRNPU   |
|                             |     | PDCD4    | LONRF2  | HIPK3        | KRIT1    | EPM2A     | RAB1A    | E2F3     |
|                             |     | DLX2     | FAM208B | TXNL4A       | PGRMC1   | SUZ12     | CUX1     | GOLGA4   |
|                             |     | ANO5     | PBRM1   | VPS13A       | SLC31A1  | MED21     | RUFY3    | PTPN13   |
|                             |     | ZBTB38   | LMO4    | PELI1        | ZNF493   | ST5       | MIA3     | USP1     |
|                             |     | RMND5B   | KLHL9   | TSPAN2       | BMPR2    | MED28     | PCBP2    | SATB1    |
|                             |     | WHSC1L1  | ZNF595  | SMG1         | KLF7     | ESYT2     | IL1B     | RNF6     |
|                             |     | SOCS6    | LSM3    | TSPAN31      | CBX4     | TMED10    | HAX1     | SLC16A10 |
|                             |     | FBXO11   | STK38L  | SPIN1        | IL10     | LRRC8B    | RFFL     | PGK1     |
|                             |     | ATXN7L3B | PITHD1  | SNTB2        | FNIP2    | PCDH17    | CALD1    | KLF3     |
| Hsa-miR-106b-5p             | 661 | RRN3     | SLC40A1 | AHRR         | FAM118A  | FAM105A   | MCM4     | MIOS     |
|                             |     | FSTL1    | MYO5B   | CCDC6        | STYX     | ZNF717    | ZBTB10   | RLIM     |
|                             |     | USP30    | RNF34   | DEF8         | SPRYD7   | FAM102A   | RAB22A   | KIAA1462 |
|                             |     | CMTR2    | MZT1    | ZNF724P      | XPOT     | ZFP91     | FGF5     | RAB10    |
|                             |     | UGCG     | MBTPS1  | ZFHX4        | MARCH7   | UGDH      | FGFR1OP  | TMEM192  |
|                             |     | ZHX3     | DUSP2   | POC1B-GALNT4 | TRUB1    | GPR137C   | DGCR14   | SFMBT1   |
|                             |     | BTG2     | PIK3C3  | TNKS2        | DERL2    | USP31     | RNF24    | TXN      |
|                             |     | OTUD1    | CELF1   | AFF4         | SLC7A11  | SLC36A1   | NFATC2IP | ZNF207   |
|                             |     | COX7A2L  | LARS    | SAMD10       | LIPT1    | SOX5      | PIP4K2C  | SFT2D2   |
|                             |     | PFKP     | SPOPL   | AKAP10       | C2orf69  | RAP1B     | RIT1     | ZNF770   |
|                             |     | ANKRA2   | SEC23IP | ALG13        | SLC5A3   | ADAMTS1   | NABP1    | PAF1     |

|  |  |           |          |          |         |          |          |          |
|--|--|-----------|----------|----------|---------|----------|----------|----------|
|  |  | AEN       | AGPAT3   | STC1     | CAMK2N1 | BIRC6    | GPAM     | FAM117B  |
|  |  | FGL2      | IRS1     | FRMPD4   | NFIC    | PPP3R1   | MTPN     | C16orf70 |
|  |  | RGMB      | DHX33    | NSD1     | UTP23   | USP46    | SSR1     | F3       |
|  |  | SOS1      | ZNF24    | FRMD6    | TES     | FAM117A  | SLC25A36 | EIF4G2   |
|  |  | NHLRC3    | ZZEF1    | MAPRE3   | WDR26   | APOPT1   | PPP2CA   | PWWP2B   |
|  |  | ARHGAP11A | RAD18    | ARPP19   | ASB1    | MED17    | C2CD2    | FICD     |
|  |  | G3BP1     | RAI14    | LDLR     | C3orf70 | NLK      | KIF13A   | EPAS1    |
|  |  | MPZL2     | FKBP14   | RIF1     | BCL11B  | BCORL1   | NAA30    | CDC5L    |
|  |  | UBE2G1    | FGD4     | COP52    | RP2     | EID2B    | MSMO1    | UBE3C    |
|  |  | AGFG1     | DYNC1LI2 | BVES     | UBE2B   | FMNL3    | ADIPOR1  | HNRNPH2  |
|  |  | GTF2A1    | CRIP1    | RBM26    | CCNT2   | SNAP23   | SKIDA1   | MKRN1    |
|  |  | EP300     | COIL     | VLDLR    | JOSD1   | TMED8    | GCNT4    | NCOA7    |
|  |  | RASSF3    | GPATCH2L | DBT      | RNF138  | SDHAF2   | SYBU     | ZBTB5    |
|  |  | C2orf49   | APPBP2   | HPS3     | SLC35A1 | PIP4K2A  | DDX17    | MORF4L1  |
|  |  | NBEAL1    | ZBTB18   | NAA50    | LASP1   | ARHGAP1  | KLHDC10  | PEX5L    |
|  |  | KBTBD8    | COA5     | SAMD9L   | PLAA    | ZBTB33   | PKIA     | SBNO1    |
|  |  | AP1G1     | TMEM33   | NTN4     | ZBTB4   | MED7     | SRSF2    | DOCK7    |
|  |  | GNAI3     | ARIH1    | EPHA7    | MBD2    | ZNF706   | RAB12    | B4GALT5  |
|  |  | VCPIP1    | SIPA1L2  | EDNRB    | HEG1    | S1PR1    | ZNF106   | TRPS1    |
|  |  | NETO2     | ERAP1    | EIF2S1   | ZBTB6   | CIC      | ABHD10   | FBXO28   |
|  |  | SLC16A14  | ARL4C    | EPRS     | MCL1    | TMX3     | MED12L   | CASP2    |
|  |  | MMS22L    | POU6F1   | TNFRSF17 | EHBP1   | MTURN    | ABHD17B  | CAPN7    |
|  |  | DSP       | CCNG2    | RBM7     | WDR82   | ANKRD13C | PANK2    | BNC2     |
|  |  | IRF1      | SCD5     | SPAG9    | PRNP    | CHD2     | ACVR1B   | GTF2H3   |
|  |  | INIP      | ACTR1A   | ZNF264   | FAF2    | JMY      | DCAF10   | RANBP2   |
|  |  | SOX4      | VPS25    | PDPK1    | CEP104  | SLC9A6   | TM9SF3   | ETV1     |
|  |  | C5orf24   | AQP4     | CD2AP    | MAN1A2  | SNX9     | FAM83D   | EOGT     |
|  |  | PTPDC1    | UBN2     | WDR36    | USP37   | DCUN1D1  | SMG7     | TTC9     |
|  |  | MED13L    | TANC1    | MYCL     | PTBP1   | POLR2F   | GINM1    | ADAMTS5  |
|  |  | NFIA      | NEBL     | ROBO1    | FBXO30  | REEP5    | SLC41A1  | STK38    |
|  |  | RAB8B     | GPATCH2  | XIAP     | CSRNP3  | FOXA1    | TGFBR2   | CYBRD1   |
|  |  | CCDC50    | UBXN7    | TMEM9B   | CDC40   | TSC22D2  | C16orf87 | RBP1     |
|  |  | ATG2B     | TP53INP2 | SLC36A4  | GALNT10 | IFI44L   | ACAP2    | PPP2R3A  |
|  |  | TAF7      | ANTXR2   | GPR176   | H1F0    | RASA2    | ZNF680   | BMP2K    |
|  |  | LAPTM4A   | PCCB     | GNS      | CREBL2  | ANKFY1   | SUCO     | C3orf38  |
|  |  | RFC3      | MAK16    | IFNAR1   | BBX     | ABHD13   | GXYLT1   | SESN2    |
|  |  | ARL4A     | SMYD5    | MKLN1    | CREB5   | IQGAP1   | NBL1     | HNRNPL   |
|  |  | TAOK3     | TPBG     | LAMTOR5  | WFS1    | CCPG1    | KCNN2    | TMEM56   |
|  |  | RUNX3     | TUSC2    | B2M      | PTDSS1  | CKAP2    | FBXL3    | TMEM168  |
|  |  | SLK       | SUV420H1 | KIF5A    | CUL1    | TMEM181  | TMEM30A  | FJX1     |
|  |  | DIP2C     | GMFB     | TBC1D20  | DEPDC1  | ZBTB9    | ATXN1    | NARS     |

|  |  |         |              |              |          |              |              |             |
|--|--|---------|--------------|--------------|----------|--------------|--------------|-------------|
|  |  | ZNF202  | TCF4         | PARD6G       | TNFAIP1  | ITPKB        | FAM168A      | RNF128      |
|  |  | MAP3K5  | NUPL1        | ZFYVE20      | ZDHHC17  | FGF2         | CTNND1       | PHTF2       |
|  |  | ROCK2   | POGK         | ADO          | PKN2     | SLAIN2       | GPD2         | CSNK2A1     |
|  |  | ZNF704  | NRAS         | ZNF362       | SEC23A   | AMMECR1<br>L | ZNF800       | EPM2AIP1    |
|  |  | CYP2U1  | CXCL8        | UBE2J1       | MCF2L    | SKI          | VANGL1       | WAC         |
|  |  | SQSTM1  | MAPK9        | TGFBR1       | LGALS1   | TET2         | PDZD11       | LRPAP1      |
|  |  | FOXK2   | UTP14C       | HAS2         | VASH2    | CCNT1        | CPS1         | SIK1        |
|  |  | TMEM127 | PPTC7        | WDR4         | DCTN4    | LAMTOR1      | CCDC71L      | FCHO2       |
|  |  | SAMD12  | CSTF2T       | CNOT7        | BRI3BP   | TCERG1       | CCND2        | RUFY2       |
|  |  | LNPEP   | RPP14        | CRIM1        | KCNK2    | RRM2         | LZIC         | SLC17A5     |
|  |  | CTDSPL2 | KIF14        | CCND1        | SOGA1    | PHACTR2      | AJUBA        | STK17B      |
|  |  | KPNA3   | 37469        | TCEB3        | SIKE1    | KLHL8        | PIK3R1       | HIPK1       |
|  |  | FBXO22  | CDR2         | NOTCH2       | VEZF1    | ARAP2        | CYB561D1     | ARSJ        |
|  |  | KCNC1   | FOXJ2        | TSNAX        | PRKAR2B  | PRR15        | ANKIB1       | MBOAT2      |
|  |  | FITM2   | DUSP18       | KDM6B        | KDM5B    | MFN1         | HELZ         | PARD6B      |
|  |  | GOLGA3  | C10orf76     | PSMD12       | DNM3     | ANKRD50      | EIF4A2       | FMN2        |
|  |  | BTG1    | AHR          | ZBTB7A       | TCF7L1   | EFNB2        | SCAMP2       | PDE4A       |
|  |  | C5orf28 | MAGT1        | IPO5         | CITED2   | IPO7         | TET1         | SAR1B       |
|  |  | MFSB8   | COQ10B       | UBE2Q2       | CLSTN1   | RNASEH2B     | PREPL        | ZNF850      |
|  |  | RAPH1   | SERTAD2      | KLF12        | MYLIP    | F2R          | CENPI        | PAK2        |
|  |  | PCYT1A  | GOLGA1       | PLEKHO2      | RBM12    | CAMSAP2      | KLHL20       | VHL         |
|  |  | MSH6    | IQSEC2       | KCNK1        | NUCKS1   | RBBP7        | SNRPD3       | MAP3K9      |
|  |  | GREB1   | C7orf60      | MEX3D        | EIF4E    | PIGN         | PPM1G        | UBXN2A      |
|  |  | PELO    | DYRK2        | CHMP3        | PRPF4    | DNAJC27      | SPRY4        | SMAD5       |
|  |  | MOSPD2  | PCNX         | IPMK         | MKNK2    | TMBIM6       | RAP2C        | C1orf43     |
|  |  | REEP3   | RNF2         | GPR157       | DEDD     | TNFRSF21     | FBXO48       | CAMK2N<br>2 |
|  |  | POLR1E  | SH3PXD2<br>A | AGFG2        | FOXJ3    | ZNF367       | RORC         | RBMS1       |
|  |  | SEMA3A  | ABCD2        | FAM199X      | RCCD1    | PDE7A        | OTULIN       | ZNF445      |
|  |  | BTN3A1  | PGM2L1       | CDCA7        | SLC35F5  | RASL11B      | RNF149       | MDM4        |
|  |  | RPA2    | ANKRD52      | IRS2         | EZH1     | TIMMDC1      | WDR37        | STT3B       |
|  |  | TRIM3   | ARNTL2       | NAPEPLD      | DVL3     | SMU1         | CDC42SE2     | SYAP1       |
|  |  | LAMP3   | TAGAP        | CRYBG3       | METTL14  | RSBN1        | SH3RF1       | C2CD4A      |
|  |  | ABCA1   | PFN2         | SPECC1       | F13A1    | SMOC1        | VMA21        | UBC         |
|  |  | REST    | TMPO         | CBX8         | PTPRD    | KIAA1191     | HIVEP3       | NDN         |
|  |  | PLXNA1  | MOB1B        | CUL3         | IL17RD   | MOB1A        | ARHGAP3<br>5 | DUSP8       |
|  |  | OTUD3   | C6orf62      | RND3         | TFAM     | GSPT1        | CAPN15       | DCAF8       |
|  |  | LRRC58  | RRAS2        | CALCOCO<br>2 | SASH1    | C5orf30      | RIMKLA       | DNAJC10     |
|  |  | PPM1A   | NDUF52       | TRIB1        | SLC22A23 | CNTNAP2      | ASF1A        | SLC39A6     |
|  |  | IPO8    | STRIP1       | ZKSCAN1      | GIPC2    | TMEM200C     | CTSA         | XRCC2       |
|  |  | ULK1    | NRBP1        | YPEL1        | LDLRAP1  | MACC1        | TTPAL        |             |

|                |     |         |                |          |          |           |          |         |
|----------------|-----|---------|----------------|----------|----------|-----------|----------|---------|
|                |     | CAMTA1  | ASXL2          | SLC48A1  | FAM8A1   | KCMF1     | ZMPSTE24 |         |
|                |     | SLC2A3  | BLOC1S5-TXNDC5 | ITGB8    | KIAA0247 | SOCS1     | SKIL     |         |
|                |     | TEAD3   | ZNF738         | PHF12    | USP15    | AP3D1     | CERCAM   |         |
| Hsa-miR-143-3p | 133 | CD44    | CCSER1         | GATAD1   | FAM60A   | TPP1      | CRAMP1L  | 37104   |
|                |     | CIPC    | LIMD1          | KIAA1147 | XPR1     | LIFR      | ARSD     | KLHL11  |
|                |     | RAE1    | CHD6           | PTGS2    | PRKCE    | HCCS      | EIF2AK1  | COL5A1  |
|                |     | C9orf91 | KIAA0355       | NPR3     | PTPN23   | MGA       | MAP1B    | VTI1B   |
|                |     | NUP155  | INO80D         | SIPA1L3  | INPP5F   | PACS1     | RANBP10  | JDP2    |
|                |     | ZDHHC2  | SARS           | ADAM10   | SLC25A25 | FSCN1     | RARG     | ARCN1   |
|                |     | TFDP2   | CPSF7          | ANKRD17  | EIF2AK2  | TRAK2     | BRWD3    | AKAP11  |
|                |     | GPR180  | PDP1           | DRAM1    | TMEM178B | CMPK1     | KANK2    | ZSCAN22 |
|                |     | BBC3    | ATF7           | ATXN7    | GFPT1    | SECISBP2L | SLC1A3   | MTMR3   |
|                |     | TMEM19  | VASH1          | CTH      | R3HCC1L  | CXCL12    | REL      | GATM    |
|                |     | CAND1   | MED14          | TMED5    | WDR11    | EPG5      | LOXL4    | PGD     |
|                |     | TENM4   | HSPA4L         | CSNK2A2  | SAP130   | TMEM245   | YARS     | SLC38A7 |
|                |     | COL1A1  | ASH1L          | PPIA     | KRT80    | TBL1XR1   | AMOTL1   | RPL37   |
|                |     | PTPN11  | EMP1           | MLLT3    | ARHGAP18 | THBS1     | RGP1     | GGA2    |
|                |     | GTF3C3  | ARPC5          | GPD1L    | MAPK1    | JARID2    | 37865    | SF3B3   |
|                |     | C5orf38 | ZNF709         | AMIGO1   | UBE2R2   | CA2       | HIPK2    | VP545   |
|                |     | ZFP37   | CDK6           | KPNA1    | IAPP     | PRSS23    | TCF20    | AMER1   |
|                |     | FNDC1   | TMEM248        | IGFBP5   | ANKH     | PAFAH1B2  | AKAP8    | HDLBP   |
|                |     | SRSF11  | ZNF281         | SLC25A42 | ETFDH    | DCP2      | IGF2R    | SENP5   |
| Hsa-miR-205-5p | 48  | C9orf78 | KIFAP3         | TTC3     | CBWD5    | HNRNPH3   | CHCHD3   | SRPR    |
|                |     | PTEN    | BCL2           | NDUFA4   | NXF1     | SEH1L     | CCNJ     | PSMD13  |
|                |     | NDST1   | FEM1B          | CBX1     | VEGFA    | CRLF3     | HSPA9    | UPP1    |
|                |     | TERF2IP | MRPS17         | PSMD2    | TP53BP1  | SNW1      | CREB1    | CHURC1  |
|                |     | CHMP5   | TSPYL4         | RNF168   | TCEAL4   | IRF4      | TDG      | CALM1   |
|                |     | NEFH    | E2F1           | APT-X    | RAB31    | ROCK1     | TMEM39B  | PHLDB2  |
|                |     | PSMG4   | MYL6           | KCNJ10   | YES1     | LETM2     | PRELID1  |         |

**Supplementary Table S2.** Target genes and their pathways for hsa-miR-205-5p and miR-143-3p.

| Term                    | P-value  | Adjusted P-value | Genes                                                                                                                                                        |
|-------------------------|----------|------------------|--------------------------------------------------------------------------------------------------------------------------------------------------------------|
| Disease                 | 1,13E-07 | 8,75E-05         | SEH1L;PSMD13;SRPR;PTEN;PSMD2;MAPK1;RPL37;RAE1;KPNA1;SUPT16H;IGFBP5;NUP155;PRKCE;GFPT1;EIF2AK2;ADAM10;PTPN11;CREB1;PACS1;IAPP;TPP1;CALM1;GRSF1;PPIA;CD44;DCP2 |
| p53 activity regulation | 1,08E-05 | 0,003653404      | CDK6;CCNG1;BCL2;PTEN;E2F1;TNFRSF10B;THBS1;BBC3;HIPK2                                                                                                         |

|                                                         |          |             |                                                                                                                                                   |
|---------------------------------------------------------|----------|-------------|---------------------------------------------------------------------------------------------------------------------------------------------------|
| Signaling by PDGF                                       | 1,41E-05 | 0,003653404 | COL1A1;CREB1;COL5A1;PRKCE;PTEN;MAPK1;PTPN11;CALM1;THBS1                                                                                           |
| Senescence and autophagy                                | 2,20E-05 | 0,004045415 | COL1A1;IGFBP5;BCL2;PTEN;E2F1;MAPK1;THBS1;CD44                                                                                                     |
| Integrins in angiogenesis                               | 2,61E-05 | 0,004045415 | COL1A1;ROCK1;COL5A1;COL12A1;MAPK1;PTPN11;VEGFA                                                                                                    |
| HIV factor interactions with host                       | 1,37E-04 | 0,013408765 | SEH1L;NUP155;PSMD13;PACS1;PSMD2;PPIA;RAE1;KPNA1                                                                                                   |
| Signaling events mediated by PRL                        | 1,38E-04 | 0,013408765 | PTP4A1;PTP4A2;ROCK1;MAPK1                                                                                                                         |
| Gastrin pathway                                         | 1,60E-04 | 0,013408765 | BCL2;PTGS2;CD44;IER3;VEGFA                                                                                                                        |
| Interleukin-2 signaling pathway                         | 1,72E-04 | 0,013408765 | YARS;YES1;AHNAK;PRKCE;DNAJC13;PTPN11;PKD2;MLLT3;PRSS23;BBC3;VEGFA;PTP4A1;RAB31;INPP5F;ATXN7;IRF4;REL;BCL2;MAPK1;UPP1;PTPN4;PHLDB2;IER3            |
| MicroRNA regulation of DNA damage response              | 1,73E-04 | 0,013408765 | CREB1;CDK6;CCNG1;E2F1;TNFRSF10B;BBC3                                                                                                              |
| Physiological and pathological hypertrophy of the heart | 2,27E-04 | 0,015990105 | PRKCE;MAPK1;LIFR;CALM1                                                                                                                            |
| Rev-mediated nuclear export of HIV-1 RNA                | 2,64E-04 | 0,017048987 | SEH1L;NUP155;RAE1;KPNA1                                                                                                                           |
| Interleukin-5 regulation of apoptosis                   | 3,08E-04 | 0,017633183 | YES1;CREB1;BCL2;REL;UPP1;PTGS2;CD44;IER3                                                                                                          |
| Type I interferon (interferon-alpha/beta) pathway       | 3,25E-04 | 0,017633183 | PTP4A1;PTP4A2;PTPN11;PTPN23;PTPN4                                                                                                                 |
| Signaling by EGFR in cancer                             | 3,41E-04 | 0,017633183 | CREB1;PRKCE;PTEN;ADAM10;MAPK1;PTPN11;CALM1                                                                                                        |
| Melanocyte development and pigmentation pathway         | 4,20E-04 | 0,019338708 | CREB1;BCL2;MAPK1                                                                                                                                  |
| Transport of mature transcript to cytoplasm             | 4,63E-04 | 0,019338708 | NXF1;SEH1L;NUP155;RAE1;SRSF11                                                                                                                     |
| Gene expression                                         | 4,70E-04 | 0,019338708 | YARS;RARG;SUPT16H;CPSF7;GTF3C3;SEH1L;SF3B3;NUP155;PSMD13;SRPR;SARS;PPP2R2A;NXF1;MED14;SNW1;MED13;TFDP2;TBL1XR1;PSMD2;RPL37;RAE1;ZFP37;DCP2;SRSF11 |
| Developmental biology                                   | 4,73E-04 | 0,019338708 | SEMA7A;ROCK1;CSNK2A2;PTPN11;COL1A1;MYL6;MED14;MED13;CREB1;COL5A1;TBL1XR1;ABL2;MAPK1;IAPP                                                          |
| Hypothetical network for drug addiction                 | 5,16E-04 | 0,020017683 | CREB1;PRKCE;MAPK1;TERF2IP                                                                                                                         |
| HIV infection                                           | 6,19E-04 | 0,022858136 | SUPT16H;SEH1L;NUP155;PACS1;PSMD13;PSMD2;RAE1;PPIA;KPNA1                                                                                           |
| PDGFB signaling pathway                                 | 8,40E-04 | 0,025987802 | YES1;PRKCE;PTEN;EIF2AK2;MAPK1;PTPN11;ARPC5                                                                                                        |
| Interferon signaling                                    | 8,56E-04 | 0,025987802 | SEH1L;NUP155;IRF4;EIF2AK2;PTPN11;RAE1;CD44;KPNA1                                                                                                  |
| Activation of BH3-only proteins                         | 9,64E-04 | 0,025987802 | BCL2;E2F1;BBC3                                                                                                                                    |
| Glioma                                                  | 9,99E-04 | 0,025987802 | CDK6;PTEN;E2F1;MAPK1;CALM1                                                                                                                        |

|                                                                                      |             |             |                                                                        |
|--------------------------------------------------------------------------------------|-------------|-------------|------------------------------------------------------------------------|
| Cyclin D-associated events in G1                                                     | 0,001002263 | 0,025987802 | CDK6;TFDP2;E2F1;PPP2R2A                                                |
| EGFR interaction with phospholipase C-gamma                                          | 0,001002263 | 0,025987802 | CREB1;PRKCE;MAPK1;CALM1                                                |
| Transport of mature mRNAs derived from intronless transcripts                        | 0,001002263 | 0,025987802 | NXF1;SEH1L;NUP155;RAE1                                                 |
| p38 alpha/beta MAPK downstream pathway                                               | 0,001002263 | 0,025987802 | ELK4;CREB1;CSNK2A2;PTGS2                                               |
| Tight junction                                                                       | 0,001004683 | 0,025987802 | YES1;PRKCE;CSNK2A2;PTEN;PPP2R2A;AMOTL1;ASH1L                           |
| Capped intron-containing pre-mRNA processing                                         | 0,00124565  | 0,031181422 | NXF1;CPSF7;SEH1L;SF3B3;NUP155;RAE1;SRSF11                              |
| Signaling by ERBB2                                                                   | 0,001300078 | 0,031526902 | YES1;CREB1;PRKCE;PTEN;MAPK1;CALM1                                      |
| Activation of NOXA and translocation to mitochondria                                 | 0,001343031 | 0,031581588 | E2F1;BBC3                                                              |
| Antiviral mechanism by interferon-stimulated genes                                   | 0,001396186 | 0,031669421 | SEH1L;NUP155;EIF2AK2;RAE1;KPNA1                                        |
| Bladder cancer                                                                       | 0,001465087 | 0,031669421 | E2F1;MAPK1;THBS1;VEGFA                                                 |
| Influenza infection                                                                  | 0,0014692   | 0,031669421 | SEH1L;NUP155;EIF2AK2;RPL37;GRSF1;RAE1;KPNA1                            |
| Estrogen receptor signaling pathway                                                  | 0,001574974 | 0,032926757 | CREB1;BCL2;MAPK1                                                       |
| Axon guidance                                                                        | 0,001676784 | 0,032926757 | COL1A1;MYL6;SEMA7A;CXCL12;CREB1;COL5A1;ROCK1;CSNK2A2;ABL2;MAPK1;PTPN11 |
| Interactions of HIV Vpr protein with host cellular proteins                          | 0,001744653 | 0,032926757 | SEH1L;NUP155;RAE1;KPNA1                                                |
| RANKL regulation of apoptosis and immune response                                    | 0,001789221 | 0,032926757 | MYL6;BCL2;ADAM10;CALM1;CD44                                            |
| Focal adhesion                                                                       | 0,001801245 | 0,032926757 | COL1A1;MYL6;COL5A1;ROCK1;BCL2;PTEN;MAPK1;THBS1;VEGFA                   |
| S1P/S1P1 pathway                                                                     | 0,001821634 | 0,032926757 | MAPK1;PTGS2;VEGFA                                                      |
| Immune system signaling by interferons, interleukins, prolactin, and growth hormones | 0,00182455  | 0,032926757 | SEH1L;YES1;NUP155;IRF4;EIF2AK2;MAPK1;PTPN11;RAE1;CD44;KPNA1            |
| Syndecan 1 pathway                                                                   | 0,002059214 | 0,036317054 | COL1A1;COL5A1;COL12A1;MAPK1                                            |
| Integrated breast cancer pathway                                                     | 0,002165805 | 0,037348099 | CREB1;BCL2;PTEN;E2F1;MAPK1;HIPK2;VEGFA                                 |
| Signaling by SCF-KIT                                                                 | 0,002257788 | 0,038087894 | CREB1;YES1;PTEN;MAPK1;PTPN11                                           |
| Apoptosis                                                                            | 0,002328336 | 0,03844232  | ROCK1;PSMD13;IRF4;PSMD2;BCL2;E2F1;TNFRSF10B;BBC3;KPNA1                 |
| Inactivation of BCL-2 by BH3-only proteins                                           | 0,002776877 | 0,044892848 | BCL2;BBC3                                                              |
| Small cell lung cancer                                                               | 0,003119812 | 0,049407642 | CDK6;PTEN;E2F1;BCL2;PTGS2                                              |

**Supplementary Table S3.** Target genes and their pathways for hsa-miR-21-5p and miR-106b-5p.

| Term                                                                                 | P-value  | Adjusted P-value | Genes                                                                                                                                                                                                                                                                                                                                                                                                                                                     |
|--------------------------------------------------------------------------------------|----------|------------------|-----------------------------------------------------------------------------------------------------------------------------------------------------------------------------------------------------------------------------------------------------------------------------------------------------------------------------------------------------------------------------------------------------------------------------------------------------------|
| Interleukin-2 signaling pathway                                                      | 1,28E-07 | 1,39E-04         | RERE;TES;BTG1;CXCL8;IRS1;CITED2;FASLG;IRS2;SLC2A3;AHR;PKD2;GALNT10;FGF5;RPS6KA3;CCND2;CCND1;RGS1;CIC;IER3;IL10;EPHA4;CSNK2A1;BTN3A1;VPS13A;ARAP2;RRAS2;VEZF1;DUSP8;JOSD1;TGFB2;ITPKB;PTP4A1;IL1B;IRF1;WAC;SOS1;FAM8A1;B4GALT5;USP15;AHNAK;CBFB;PLAG1;PIK3R1;TXN;RASGRP1;MAPK9;NRAS;SOS1;CAMK2N1;STK38;UBC;S1PR1;ZSWIM6;E2F3;ZBTB7A;LDLR;CDR2;FKTN;SPAG9;STAT3;RAB27B;DN AJC13;SMAD5;EHD1;CENPI;PKIA;CCNG2;STK17B;NFIC;YPEL1;PDCD4;ESYT2;PTPN4;BRWD1;PDE7A |
| TGF-beta signaling pathway                                                           | 7,36E-06 | 0,004023598      | MEF2A;PDPK1;STAT3;CUL1;XIAP;PPP2R2A;PIK3R1;RUNX3;SMAD5;PTK2;TGFB1;SMAD7;TGFB2;PPP2CA;SKI;PPM1A;MAPK9;ZFYVE16;CCND1;EP300;SIK1;SOS1;SKIL;PAK2                                                                                                                                                                                                                                                                                                              |
| T cell receptor regulation of apoptosis                                              | 1,14E-05 | 0,00416079       | BTG1;CXCL8;POGK;FASLG;YY1;TBK1;CCND2;CCND1;CASP2;CEP97;IER3;IL10;ANXA1;F2R;ATP11B;VEZF1;DUSP8;RAD23B;ZDHHC17;PPM1A;HAX1;TMX3;RP2;IL1B;IRF1;KIAA0247;TFAM;TMIM6;MAPRE1;IFNAR1;PSMD12;EPAS1;SATB1;CUL1;SLC5A3;RASGRP1;NRAS;PGK1;BNIP2;ZBTB7A;MCL1;ZBTB18;MAP3K2;ERAP1;TNFRSF10B;KLHL20;CXCL10;SCD;PKIA;STK17B;JMY;PDE7A;TMEM9B                                                                                                                              |
| MAPK signaling pathway                                                               | 1,63E-05 | 0,004464616      | FASLG;NLK;ACVR1B;FGF2;RASGRP1;DUSP16;ELK4;FGF5;RAP1B;RPS6KA3;MAPK9;PPP3R1;NRAS;MKNK2;CASP2;MAP3K9;PAK2;EIF4E;MAP3K5;MEF2A;MAP3K2;DUSP2;RRAS2;GNG12;DUSP8;TGFB1;TGFB2;PPM1A;TAOK3;IL1B;RASA2;SOS1;SOS2                                                                                                                                                                                                                                                     |
| Messenger RNA processing                                                             | 3,52E-05 | 0,006916179      | RANBP2;TMED10;CELF1;DDX1;HNRNPU;CSTF2T;GTF2H3;SMC1A;CDC40;CCAR1;PPM1G;HNRNPL;PRPF4;PTBP1;PCBP1;PCBP2;HNRNPA2B1;SRSF2;POLR2F;HNRNP H2;SNRPD3;TXNL4A;NUPL1;EIF4E                                                                                                                                                                                                                                                                                            |
| Signaling by FGFR mutants                                                            | 3,80E-05 | 0,006916179      | FGF5;NRAS;CUX1;STAT3;GAB1;FGFR1OP;FRS2;PIK3R1;SOS1;FGF2                                                                                                                                                                                                                                                                                                                                                                                                   |
| Messenger RNA splicing: major pathway                                                | 7,43E-05 | 0,010071272      | HNRNPL;PTBP1;PRPF4;PCBP1;PCBP2;HNRNPA2B1;SRSF2;HNRNPU;HNRNP H2;SMC1A;CDC40;CCAR1                                                                                                                                                                                                                                                                                                                                                                          |
| Antigen presentation: folding, assembly, and peptide loading of class I MHC proteins | 8,23E-05 | 0,010071272      | PSMD12;SEC23A;RNF34;UBE3C;SAR1B;UBA6;CUL3;CUL1;RNF6;UBE2J1;SOS1;RNF138;UBE2Q2;UBC;VHL;SKP2;B2M;UBE2B;ERAP1;LNPEP;UBE2G1;PJA2;KLHL20;KLHL9;UBE2W;MKRN1;ASB1                                                                                                                                                                                                                                                                                                |

|                                                               |          |             |                                                                                                                                                                                                                                                                                                                                                                  |
|---------------------------------------------------------------|----------|-------------|------------------------------------------------------------------------------------------------------------------------------------------------------------------------------------------------------------------------------------------------------------------------------------------------------------------------------------------------------------------|
| Eukaryotic protein translation                                | 8,75E-05 | 0,010071272 | EIF4A2;EIF5;EIF1AX;EIF2S1;EIF4E;EIF4G2                                                                                                                                                                                                                                                                                                                           |
| Capped intron-containing pre-mRNA processing                  | 9,21E-05 | 0,010071272 | RANBP2;HNRNPU;SMC1A;CDC40;CCAR1;HNRNPL;PRPF4;PTBP1;PCBP1;PCBP2;HNRNPA2B1;SRSF2;POLR2F;HNRNPH2;SNRPD3;TXNL4A;EIF4E;NUPL1                                                                                                                                                                                                                                          |
| Neurotrophic factor-mediated Trk receptor signaling           | 1,03E-04 | 0,010227585 | RAP1B;NRAS;RIT1;CCND1;MCF2L;STAT3;GAB1;FRS2;PIK3R1;SOS1;SQSTM1                                                                                                                                                                                                                                                                                                   |
| Protein processing in the endoplasmic reticulum               | 1,18E-04 | 0,010775865 | MBTPS1;SEC23A;SAR1B;WFS1;CUL1;DERL2;YOD1;UBE2G1;EIF2S1;RAD23B;UBE2J1;MAPK9;MAN1A2;DNAJC10;CAPN2;PLAA;SSR1;STT3B;MAP3K5;SEC63                                                                                                                                                                                                                                     |
| Insulin signaling pathway                                     | 1,37E-04 | 0,010973012 | PRKAA2;IRS1;ROCK2;SNAP23;RORC;IRS2;PIK3R1;IGF1R;RPS6KA3;MAPK9;NRAS;SOC1;PRKAR2B;MKNK2;MAP3K9;EIF4E;MAP3K5;MAP3K2;PRKAB2;CSNK2A1;PDPK1;GAB1;RHOB;EHD1;PPP1R3B;PIK3C3;SOS1;SOS2                                                                                                                                                                                    |
| p53 activity regulation                                       | 1,41E-04 | 0,010973012 | DYRK2;RRM2;TNFRSF10B;FBXO11;YY1;PPP2CA;MAPK9;CCND2;CCND1;SESN1;CCNG2;SESN2;CCNG1;EP300;MDM4;SKP2                                                                                                                                                                                                                                                                 |
| Signaling by insulin receptor                                 | 1,90E-04 | 0,013310553 | PRKAB2;PRKAA2;IRS1;PDPK1;GAB1;IRS2;FRS2;PIK3R1;FGF2;FGF5;PPM1A;NRAS;PIK3C3;SOS1;EIF4E                                                                                                                                                                                                                                                                            |
| EIF4E and p70 S6 kinase regulation                            | 2,01E-04 | 0,013310553 | EIF4A2;PPP2CA;IRS1;PDPK1;PIK3R1;EIF4E;EIF4G2                                                                                                                                                                                                                                                                                                                     |
| Wnt signaling pathway and pluripotency                        | 2,07E-04 | 0,013310553 | TCF7L1;CTNND1;PPP2R2A;ZBTB33;PPP2R3A;NLK;PPP2CA;MAPK9;CCND2;CCND1;EP300;DVL3;LDLR;PAFAH1B1                                                                                                                                                                                                                                                                       |
| Skeletal muscle hypertrophy is regulated via AKT/mTOR pathway | 2,43E-04 | 0,014326993 | PPP2CA;PDPK1;PIK3R1;EIF2S1;EIF4E;IGF1R                                                                                                                                                                                                                                                                                                                           |
| Signaling by TGF-beta receptor complex                        | 2,49E-04 | 0,014326993 | SKI;PPM1A;USP15;CCNT2;CCNT1;UBC;SKIL;TGFB1;TRIM33;TGFB2;SMAD7                                                                                                                                                                                                                                                                                                    |
| Gene expression                                               | 2,75E-04 | 0,015038801 | EIF4A2;SMG1;ZNF493;CCNT2;THRB;CCNT1;CHD9;RORC;HNRNPU;PPP2R2A;EPRS;SMG7;MED17;CCAR1;NARS;PTBP1;MED13;SNRPD3;ZNF445;TXNL4A;TNPO1;ZNF202;TEAD3;NCOA2;SUPT16H;EIF1AX;ZNF10;SMC1A;CDC40;NRBP1;MED7;PPM1A;PRPF4;CLNS1A;SRSF2;TFAM;HNRNPH2;ZNF595;NOTCH2;GTF2A1;PSMD12;RRN3;PPP2CA;LARS;PCBP1;PCBP2;UBC;TCEB3;SSR1;POLR2F;EIF4E;SKIL;ZKSCAN1;RANBP2;ZNF264;MBD2;GTF2H3; |

|                                                                                    |          |             |                                                                                                                                                                                                                        |
|------------------------------------------------------------------------------------|----------|-------------|------------------------------------------------------------------------------------------------------------------------------------------------------------------------------------------------------------------------|
|                                                                                    |          |             | EIF2S1;LSM3;SMAD7;SKI;HNRNPL;CNOT6;EIF5;CNOT7;NFIA;NFIC;HNRNPA2B1;NUPL1;TRIM33                                                                                                                                         |
| <b>SHP2 signaling</b>                                                              | 3,07E-04 | 0,015734837 | NRAS;IRS1;LMO4;GAB1;GNAI3;FRS2;PIK3R1;SOS1;ARHGAP35;IGF1R                                                                                                                                                              |
| <b>IGF1 pathway</b>                                                                | 3,26E-04 | 0,015734837 | IRS1;PDPK1;IRS2;PIK3R1;SOS1;PTK2;IGF1R                                                                                                                                                                                 |
| <b>Cyclin D-associated events in G1</b>                                            | 3,38E-04 | 0,015734837 | PPP2CA;CCND2;CCND1;UBC;CUL1;PPP2R2A;E2F3;SKP2                                                                                                                                                                          |
| <b>Signaling by NGF</b>                                                            | 3,46E-04 | 0,015734837 | MEF2A;ARHGEF12;PRDM4;IRS1;PDPK1;STAT3;FRS2;IRS2;PIK3R1;RTN4;PPP2CA;DNM3;RPS6KA3;FGD4;NRAS;RIT1;PRKAR2B;MCF2L;UBC;CASP2;SOS1;SQSTM1;SOS2                                                                                |
| <b>E-cadherin nascent AJ-like junctions pathway</b>                                | 4,07E-04 | 0,017565651 | RAP1B;ENAH;CCND1;CSNK2A1;CTNND1;IQGAP1;PIK3R1;KLHL20                                                                                                                                                                   |
| <b>Interleukin-4 regulation of apoptosis</b>                                       | 4,18E-04 | 0,017565651 | CXCL8;CITED2;SATB1;FGL2;F13A1;OSBPL11;RASGRP1;ATXN1;S1PR1;CASP2;KCNN2;TNS1;IL10;ANXA1;F3;ZDHHC17;ITPKB;ARL4C;CCPG1;STK17B;RASA2;MCM4;RBM51;MXD1;SOS1;FJX1                                                              |
| <b>Developmental biology</b>                                                       | 4,54E-04 | 0,018363952 | SEMA7A;ROCK2;CHD9;SEMA3A;NTN4;LAMC1;ACVR1B;ARHGAP35;MED17;ROBO1;RPS6KA3;NRAS;MED13;ABL2;PLXNA1;EP300;BNIP2;PAK2;MEF2A;SPAG9;NCOA2;PRNP;ARHGEF12;CSNK2A1;RGMB;PTK2;MED7;MED13L;RHOB;ENAH;DNM3;MED21;TCF4;SOS1;SOS2;PFN2 |
| <b>PRC2 complex long-term gene silencing through modification of histone tails</b> | 4,75E-04 | 0,018544146 | SUZ12;YY1;CBX4;RBBP7;EZH1                                                                                                                                                                                              |
| <b>Apoptosis</b>                                                                   | 5,27E-04 | 0,019302118 | HRK;DSP;PSMD12;SATB1;XIAP;TNFRSF10B;FASLG;PIK3R1;PTK2;IGF1R;LMNB1;PPP3R1;H1FO;PRKAR2B;IL1B;IRF1;UBC;CAPN2;CASP2;DNM1L;PAK2;TNFRSF21;APPL1;MCL1                                                                         |
| <b>Signaling by bone morphogenetic protein (BMP)</b>                               | 5,59E-04 | 0,019302118 | SKI;BMPR2;ZFYVE16;FSTL1;SMAD5;SMAD7                                                                                                                                                                                    |
| <b>Plasma membrane estrogen receptor signaling</b>                                 | 5,82E-04 | 0,019302118 | NRAS;ROCK2;GNAQ;GNAI3;STRN;PIK3R1;SOS1;IGF1R                                                                                                                                                                           |
| <b>Transcriptional activity of SMAD2/SMAD3-SMAD4 heterotrimer</b>                  | 5,82E-04 | 0,019302118 | SKI;PPM1A;CCNT2;CCNT1;UBC;SKIL;TRIM33;SMAD7                                                                                                                                                                            |
| <b>Endocytosis</b>                                                                 | 5,83E-04 | 0,019302118 | IQSEC2;F2R;ZFYVE20;ARAP2;PARD6G;RAB22A;RAB11A;TGFBF1;IGF1R;SMAD7;TGFBF2;EHD1;DNM3;ACAP2;                                                                                                                               |

|                                                                |             |             |                                                                                                                                                                                                                                                                                                                                                                                                                                   |
|----------------------------------------------------------------|-------------|-------------|-----------------------------------------------------------------------------------------------------------------------------------------------------------------------------------------------------------------------------------------------------------------------------------------------------------------------------------------------------------------------------------------------------------------------------------|
|                                                                |             |             | PARD6B;ZFYVE16;CHMP3;LDLRAP1;DNM1L;VPS25;LDLR                                                                                                                                                                                                                                                                                                                                                                                     |
| Signaling by Robo receptor                                     | 6,21E-04    | 0,01994998  | ENAH;ABL2;SOS1;PAK2;SOS2;ROBO1;PFN2                                                                                                                                                                                                                                                                                                                                                                                               |
| Immune system                                                  | 6,44E-04    | 0,020098146 | EIF4A2;UBE3C;IRS1;IRS2;RPS6KA3;ACTR1A;TBK1;UBE2Q2;AP1G1;KIF5A;EP300;CASP2;KPNA4;ARIH1;SKP2;KPNA3;B2M;MEF2A;PDPK1;ZFYVE20;PJA2;ENAH;DNM3;DYNC1LI2;SIKE1;IL1B;IRF1;PELI1;PIK3C3;SOS1;SQSTM1;IFNAR1;SEC23A;PSMD12;RNF34;SAR1B;UBA6;DCTN4;CUL3;CUL1;RNF6;PIK3R1;TXN;RASGRP1;UBE2J1;RAP1B;PPP2CA;MAPK9;NRAS;SOC1;RNF138;PCBP2;UBC;VHL;EIF4E;PAK2;CTSA;RANBP2;UBE2B;STAT3;ERAP1;LNPEP;UBE2G1;KLHL20;KLHL9;UBE2W;MKRN1;NUPL1;EIF4G2;ASB1 |
| BMP receptor signaling                                         | 6,89E-04    | 0,020923874 | SKI;PPM1A;BMPR2;ZFYVE16;XIAP;RGMB;SMAD5;SMAD7                                                                                                                                                                                                                                                                                                                                                                                     |
| FSH regulation of apoptosis                                    | 7,60E-04    | 0,022284792 | RAB1A;SMARCD1;CTNND1;SNAP23;ARHGAP1;MSMO1;CREBL2;VLDLR;NLK;ARHGAP35;PPP3R1;PGRMC1;PGK1;LDLR;IER3;MAP3K5;CSNK2A1;BCL11A;MBD2;RHOB;TGFB2;ARL4C;PTP4A1;GPRC5A;TM6IM6                                                                                                                                                                                                                                                                 |
| p75 neurotrophin receptor-mediated signaling                   | 7,75E-04    | 0,022284792 | ARHGEF12;PRDM4;XIAP;PIK3R1;RTN4;RHOB;FGD4;MAPK9;MCF2L;UBC;NDN;CASP2;SOS1;SQSTM1;SOS2                                                                                                                                                                                                                                                                                                                                              |
| TGF-beta regulation of extracellular matrix                    | 8,69E-04    | 0,024111626 | DLX2;SEC23A;CITED2;SEMA3A;FGL2;SLC40A1;STC1;AHR;PIK3R1;SLC7A11;LAMC1;UGCG;GOLGA4;PGRMC1;CCND1;ADAMTS1;STK38;S1PR1;SSR1;HAS2;BNIP2;E2F3;FAM3C;SKIL;MAP3K5;MAP3K2;MBTPS1;TCF7L1;F2R;ZNF10;PTPN13;F3;SMAD7;SKI;ARL4A;WEE1;NFIA;SCD;IL1B;STK17B;RBP1;CCNG1;SOS2;PFKP                                                                                                                                                                  |
| mTOR signaling pathway                                         | 9,04E-04    | 0,024111626 | EIF4A2;PRKAA2;RRN3;IRS1;PDPK1;PIK3R1;YY1;PPP2CA;RPS6KA3;NRAS;PDCD4;ULK1;EIF4E;EIF4G2                                                                                                                                                                                                                                                                                                                                              |
| HIV-1 elongation complex formation in the absence of HIV-1 Tat | 9,04E-04    | 0,024111626 | SUPT16H;CCNT2;CCNT1;TCEB3;GTF2H3                                                                                                                                                                                                                                                                                                                                                                                                  |
| Signaling by FGFR in disease                                   | 0,001077714 | 0,027434015 | PDPK1;STAT3;GAB1;FRS2;PIK3R1;IL17RD;FGF2;FGF5;PPP2CA;NRAS;CUX1;PRKAR2B;UBC;FGFR1OP;SOS1                                                                                                                                                                                                                                                                                                                                           |
| EGF receptor (ErbB1) signaling pathway                         | 0,001095619 | 0,027434015 | NRAS;STAT3;GNAI3;GAB1;PIK3R1;SOS1;PTK2                                                                                                                                                                                                                                                                                                                                                                                            |
| Actin cytoskeleton regulation                                  | 0,001126934 | 0,027434015 | ARHGEF12;ROCK2;F2R;RRAS2;IQGAP1;PIK3R1;GNG12;SSH2;FGF2;PTK2;ARHGAP35;ENAH;FGF5;NRAS;PIP4K2A;ITGB8;PIK3C3;PIP4K2C;SOS1;PAK2;SOS2;PFN2                                                                                                                                                                                                                                                                                              |

|                                                                         |             |             |                                                                                                                                                                          |
|-------------------------------------------------------------------------|-------------|-------------|--------------------------------------------------------------------------------------------------------------------------------------------------------------------------|
| TGF-beta signaling in development                                       | 0,001129488 | 0,027434015 | BMPR2;ACVR1B;SMAD5;TGFB1;SMAD7;TGFB2                                                                                                                                     |
| Nuclear beta-catenin signaling and target gene transcription regulation | 0,001331625 | 0,031640577 | NCOA2;TCF7L1;CXCL8;CCND2;CCND1;CUL1;IGF2BP1;EP300;DVL3;HBP1;TCF4                                                                                                         |
| Fatty acid, triacylglycerol, and ketone body metabolism                 | 0,001461916 | 0,033661437 | ABCA1;AGPAT5;NCOA2;PRKAB2;PRKAA2;CHD9;AGPAT3;MED7;MED13L;MED17;MED13;GPAM;GPD2;MED21;PCCB;EP300;TNFRSF21;TEAD3                                                           |
| <b>ERBB1 downstream pathway</b>                                         | 0,001494205 | 0,033661437 | MAP3K2;PDPK1;STAT3;GAB1;PPP2R2A;IQGAP1;PIK3R1;PPP2CA;RPS6KA3;MAPK9;NRAS;CAPN2;SOS1                                                                                       |
| IGF-1 receptor and longevity                                            | 0,001570662 | 0,033661437 | IRS1;PDPK1;PIK3R1;SOS1;IGF1R                                                                                                                                             |
| PTEN-dependent cell cycle arrest and apoptosis                          | 0,001570662 | 0,033661437 | PDPK1;FASLG;PIK3R1;SOS1;PTK2                                                                                                                                             |
| Signaling by constitutively active EGFR                                 | 0,001570662 | 0,033661437 | NRAS;UBC;GAB1;PIK3R1;SOS1                                                                                                                                                |
| Renal cell carcinoma                                                    | 0,001622071 | 0,034094692 | RAP1B;NRAS;EPAS1;GAB1;EP300;PIK3R1;VHL;SOS1;SO S2;PAK2                                                                                                                   |
| Axon guidance                                                           | 0,001725157 | 0,035577285 | SEMA7A;ROCK2;SEMA3A;GNAI3;NTN4;LAMC1;ARHGAP35;ROBO1;EFNB2;RPS6KA3;PPP3R1;NRAS;ABL2;PLXNA1;PAK2;EPHA4;PRNP;EPHA7;ARHGEF12;CSNK2A1;RGMB;PTK2;RHOB;ENAH;DNM3;SOS1;SOS2;PFN2 |
| Ubiquitin-mediated proteolysis                                          | 0,001988086 | 0,040240326 | UBE3C;UBE2B;UBA6;CUL3;CUL1;XIAP;UBE2G1;UBE2J1;KLHL9;UBE2W;SOCS1;UBE2Q2;BIRC6;VHL;SKP2                                                                                    |
| Signaling events regulated by Ret tyrosine kinase                       | 0,002126068 | 0,042250776 | IRS1;GAB1;IRS2;FRS2;PIK3R1;SOS1;PTK2                                                                                                                                     |
| FGF signaling pathway                                                   | 0,002179446 | 0,04253812  | PDPK1;CTNND1;STAT3;GAB1;FRS2;PIK3R1;IL17RD;SOS1;FGF2                                                                                                                     |
| Interleukin-1 signaling pathway                                         | 0,002396851 | 0,045920259 | MAP3K2;CXCL8;UBE2B;CUL1;UBE2G1;PIK3R1;UBE2J1;ELK4;UBE2W;MAPK9;UBE2Q2;IL1B;PELI1;SQSTM1                                                                                   |
| Signaling events mediated by focal adhesion kinase                      | 0,002444606 | 0,045920259 | RAP1B;MAPK9;CCND1;ROCK2;CAPN2;PIK3R1;SOS1;ARHGAP35;PTK2                                                                                                                  |

|                                               |             |             |                                                                                  |
|-----------------------------------------------|-------------|-------------|----------------------------------------------------------------------------------|
| <b>Signaling by<br/>FGFR1<br/>mutants</b>     | 0,00247877  | 0,045920259 | FGF5;CUX1;STAT3;FGFR1OP;PIK3R1;FGF2                                              |
| <b>IGF1 signaling<br/>pathway</b>             | 0,002540664 | 0,046264285 | CSNK2A1;IRS1;PIK3R1;SOS1;IGF1R                                                   |
| <b>Neurotrophin<br/>signaling<br/>pathway</b> | 0,002581996 | 0,046264285 | PRDM4;IRS1;GAB1;IRS2;FRS2;FASLG;PIK3R1;RAP1B;RPS6KA3;MAPK9;NRAS;SOS1;SOS2;MAP3K5 |
